# Supplementary material for: Proximity proteomics in a marine diatom reveals a putative cell surface-to-chloroplast iron trafficking pathway
Source: bioRxiv preprint, doi:10.1101/806539, version 2 (2021-02-04)
Supplement: Figure 5-figure supplement 1-source data 1 [file 806539_file34.xlsx]

## Sheet: Fig. 5—fig sup 1, Fig. 4C 
APEX2/WT ratio ≥2
co-expressed with pTF
pTF
Assignment of genes to WGCNA modules and response types (retrieved and adapted from S1 Dataset as appearing in Supporting information to Smith et al., PLOS Genetics, 2016).																							RPKM
Columns A-D | Gene model identifiers: Phatr3 gene model used to map reads for RPKM calculations (pt3_ensembl_id), Phatr3 gene identifier (Phatr3_ID), alternate Phatr3 gene ID (Phatr3_Alt_ID), corresponding Phatr2 gene identifer (Phatr2_ID).
Columns E-I | Expression pattern response including WGCNA module assignment (Module_Color) and Response Type assignment by either Skillings-Mack or EdgeR (LiUP = upregulated during the light, DaUP = upregulated during the dark, LoFe-UP = upregulated at low Fe (20 pM Fe' & 40 pM Fe'), HiFe-UP = upregulated at high Fe (400 pM Fe'), and response type metric (Iron Depl. vs. Iron Repl. and Light vs. D…
Columns J-W | Transmembrane domain predictions (Nr Transmembrane domains), predicted targeting, and functional annotations.
Columns X-BT | RPKM per time point and condition.
Columns BU-DD | Replicate-averaged RPKMs and associated standard deviations.
pt3_ensembl_id	Phatr3_ID	Phatr3_Alt_ID	Phatr2_ID	Module_Color	Response Type: Skillings-Mack	Response Type: EdgeR	Iron Depl. vs. Iron Repl.	Light vs. Dark	Nr Transmembrane domains	Predicted targeting	GO Description	Kegg Description	KO Description	KO Pathway	Pfam ID	Pfam Description	KOG ID	pt3_KOG_group	KOG class	pt3_KOG_desc	kog_phatr	pt3_TIGRFams_desc	L1_2PM_Pt3	L1_6PM_Pt3	L1_10PM_Pt3	L1_2AM_Pt3	L1_6AM_Pt3	L1_10AM_Pt3	L1_2PM_Pt3	L2_10AM_Pt3	L2_2PM_Pt3	L2_6PM_Pt3	L2_10PM_Pt3	L2_2AM_Pt3	L2_6AM_Pt3	L2_10AM_Pt3	M1_2PM_Pt3	M1_6PM_Pt3	M1_10PM_Pt3	M1_2AM_Pt3	M1_6AM_Pt3	M1_10AM_Pt3	M1_2PM_Pt3	M2_10AM_Pt3	M2_2PM_Pt3	M2_6PM_Pt3	M2_10PM_Pt3	M2_2AM_Pt3	M2_6AM_Pt3
augustus_masked-30-processed-gene-2.53-mRNA-1	Phatr3_J41423	309570	41423	grey	LoFe-UP	LoFe-UP	21.4301	1.25756	0	chloroplast	fructose-bisphosphate aldolase activity||glycolytic process				PF00274	Fructose-bisphosphate aldolase class-I	KOG1557	METABOLISM	Carbohydrate transport and metabolism	Fructose-biphosphate aldolase	Fructose-biphosphate aldolase (41423)		2534.97	3248.78	2869.41	2601.95	3222.18	2343.39	4822.68	2552.3	2855.94	2496.9	306.29	1283.2	3041.17	3026.22	3392.08	1716.15	1293.27	2963.31	2812.88	2743.46	3628.7	939.71	2092.71	1888.9	110.83	1827.15	3276.2
augustus_masked-9-processed-gene-5.135-mRNA-1	Phatr3_J20424	312031	20424	brown	DaUP	DaUP	0.741345	0.456521	15	signal anchor	transporter activity||transport||membrane||transmembrane transport	urea transporter			PF00474	Sodium:solute symporter family	KOG2348	METABOLISM	Amino acid transport and metabolism	Urea transporter	Urea transporter (20424)		224.46	1049.75	511.49	2246.97	2114.05	345.69	302.88	503.11	148.29	251	581.39	1127.7	2358.95	588.27	750.41	2527.62	464.04	1629.88	601.55	200.12	339.36	1004.62	262.85	163.24	695.21	1388.07	1545.71
augustus_masked-21-processed-gene-2.26-mRNA-1	Phatr3_J49202	309171	49202	grey		HiFe-UP	0.791354	0.777503	1	chloroplast		hypothetical protein								hypothetical protein	hypothetical protein (49202)		2120.48	3252.26	4511.9	3451.4	3683.92	2185.22	5564.23	1524.64	1959.32	1635.88	2136.64	1580.99	10297.2	1674.05	2618.75	3292.07	2394.89	4907.68	2626.16	1270.09	5793.55	1743.65	3458.06	3414.64	2963.41	3028.71	8822.15
augustus_masked-21-processed-gene-5.134-mRNA-1	Phatr3_J55031	302991	55031	brown	LoFe-UP+DaUP	LoFe-UP+DaUP	51.2716	0.513633	1	signal peptide		ISIP1; iron starvation induced protein								ISIP1; iron starvation induced protein	ISIP1; iron starvation induced protein (55031)		10463.9	8794.09	12105.6	16850.9	17300.7	3625.85	11548.9	5847.33	5615.09	4898.85	2720.32	8992.99	17436.5	7101.88	8131.92	6982.36	12792	15001.8	14966.6	4138.24	6106.06	364.49	6175.42	4530.48	1467.87	9333.13	15238
augustus_masked-11-processed-gene-8.41-mRNA-1	Phatr3_J46929	300183	46929	turquoise	LoFe-UP	LoFe-UP	15.5645	1.36438	1	other localisation		hypothetical protein								hypothetical protein	hypothetical protein (46929)		568.33	546.27	445.09	512.9	563.83	699.83	566.6	755.32	390.65	331.57	198.06	407.54	439.69	999.08	557.3	420.68	600.5	499.83	433.42	868.23	504.95	87.74	545.49	337.73	121.07	408.54	411.1
augustus_masked-20-processed-gene-5.134-mRNA-1	Phatr3_J51183	305020	51183	grey	LoFe-UP	LoFe-UP	10.7104	0.63677	0	signal peptide	pyridoxamine-phosphate oxidase activity||FMN binding||oxidation-reduction process	hypothetical protein			PF01243||PF13883	Pyridoxamine 5'-phosphate oxidase||Pyridoxamine 5'-phosphate oxidase	KOG3374	INFORMATION STORAGE AND PROCESSING	Transcription	Cellular repressor of transcription	Cellular repressor of transcription (51183)		2299.4	3662.68	7540.36	3667.64	4252.26	1471.82	2999.56	1549.95	1951.93	1876.23	1394.39	1583.29	5071.36	3056.42	3034.55	3149.96	5401.37	4097.05	2019.55	1702.07	1606.11	882.25	1719.83	2100.18	1045.29	1558.37	3874.52
augustus_masked-11-processed-gene-7.59-mRNA-1	Phatr3_J54656	310383	54656	lightcyan	LoFe-UP	LoFe-UP	3.95059	1.14721	0	signal peptide		HSP20; HSP20			PF00011	Hsp20/alpha crystallin family				hypothetical protein	hypothetical protein (54656)		321.47	1184.14	3159.48	119.79	174.96	317.47	220.83	349.77	1534.3	4487.14	2177.04	476.08	161.56	429.04	298.01	676.01	651.23	45.2	140.01	577.76	107.88	175.34	435.17	2755.44	954.77	208.86	104.72
maker-14-augustus-gene-4.277-mRNA-1	Phatr3_EG01987	308570		brown	DaUP		1.23701	0.50618	1	other localisation	triglyceride lipase activity||lipid metabolic process	hypothetical protein			PF01764||PF07727	Lipase (class 3)||Reverse transcriptase (RNA-dependent DNA polymerase)	KOG0017	POORLY CHARACTERIZED	General function prediction only	Transposon-encoded proteins with TYA, reverse transcriptase, integrase domains in various combinations	Transposon-encoded proteins with TYA, reverse transcriptase, integrase domains in various combinations ()		21.71	23.28	29.68	58.68	36.7	9.59	27.92	9.39	19.04	24.23	37.93	25.6	47.39	11.64	19.17	28.17	25	43.48	26.08	4.97	16.67	27.31	11.69	22.82	36.89	29.72	34.25
augustus_masked-20-processed-gene-4.20-mRNA-1	Phatr3_J52498	309136	52498	grey	LoFe-UP	LoFe-UP	6.04755	1.00006	1	signal peptide		cell surface protein								cell surface protein	cell surface protein (52498)		1732.05	1172.06	802.75	1272.65	1040.3	922.13	1355.28	1302.73	1776.38	1637.09	804.67	1194.27	2113.07	1111.25	724.74	720.22	680.42	1106.92	1055.72	841.35	1264.68	1371.79	1521.48	1328.57	552.41	1174.01	1624.88
augustus_masked-20-processed-gene-4.18-mRNA-1	Phatr3_J54986	307042	54986	brown	LoFe-UP	LoFe-UP	6.31879	0.82053	1	signal peptide		cell surface protein								cell surface protein	cell surface protein (54986)		1212.43	1331.46	1606.04	2853.05	2572.11	1490.83	2342.25	1843.13	1737.9	1635.04	1027.81	1563.71	2812.84	1862.95	1227.98	1523.49	1309.57	2021.3	1391.3	1216.41	1789.64	1611.3	1871.97	1637.92	897.72	1673.95	2417.8
augustus_masked-10-processed-gene-6.112-mRNA-1	Phatr3_J46448	306260	46448	lightcyan	LoFe-UP	LoFe-UP	3.52773	0.682442	0	signal peptide		hypothetical protein			PF00011	Hsp20/alpha crystallin family	KOG0710	CELLULAR PROCESSES AND SIGNALING	Posttranslational modification, protein turnover, chaperones	Molecular chaperone (small heat-shock protein Hsp26/Hsp42)	Molecular chaperone (small heat-shock protein Hsp26/Hsp42) (46448)		277.35	530.2	3085.51	289.82	196.6	351.73	267.76	335.55	1133.4	3549.09	3039.31	506.63	230.66	376.19	137.21	409.97	1307.61	94.07	223.53	321.53	116.56	250.11	302.21	1877.85	1273.31	258.7	116.04
augustus_masked-5-processed-gene-4.32-mRNA-1	Phatr3_J44831	303728	44831	lightyellow	LiUP	HiFe-UP+LiUP	0.784615	1.74956	6	other localisation		hypothetical protein			PF04387	Protein tyrosine phosphatase-like protein, PTPLA	KOG3187	POORLY CHARACTERIZED	General function prediction only	Protein tyrosine phosphatase-like protein PTPLA (contains Pro instead of catalytic Arg)	Protein tyrosine phosphatase-like protein PTPLA (contains Pro instead of catalytic Arg) (44831)		76.29	48.18	18.99	40.48	41.19	82.96	80.34	71.63	82.36	56.17	35.89	45.19	49.6	63.78	60.32	35.43	34.6	47.95	41.85	62.8	107.5	55.73	93.07	84.85	36.39	53.09	39.96
augustus_masked-5-processed-gene-3.192-mRNA-1	Phatr3_J44725	311752	44725	darkred	LoFe-UP+DaUP	DaUP	1.6985	0.435199	0	signal peptide		hypothetical protein								hypothetical protein	hypothetical protein (44725)		230.88	287.29	652.58	248.31	308.67	93.94	605.65	74.95	505.97	406.13	790.85	299.85	1264.83	95.3	127.95	186.42	279.54	409.5	309.77	91.9	402.21	70.22	425.35	630.96	939.71	309.97	1053.02
augustus_masked-21-processed-gene-1.72-mRNA-1	Phatr3_J39807	303007	39807	darkorange			0.657879	1.11716	1	signal peptide		hypothetical protein								hypothetical protein	hypothetical protein (39807)		266.11	448.92	131.92	108.63	223.88	3.74	139.37	12.2	153.94	232.72	104.19	180.75	299.09	33.79	327.08	752.13	97.12	180.76	109.67	3.91	90.09	36.95	189.05	194.7	140.29	89.74	299.99
RICE:10145701	Phatr3_J31433	300869	31433	grey			0.946763	0.734987	6	other localisation	ATP binding||membrane||ATPase activity	hypothetical protein			PF00005||PF01061||PF12698	ABC transporter||ABC-2 type transporter||ABC-2 family transporter protein	KOG0061	METABOLISM	Secondary metabolites biosynthesis, transport and catabolism	Transporter, ABC superfamily (Breast cancer resistance protein)	Transporter, ABC superfamily (Breast cancer resistance protein) (31433)		223.57	217.18	538.29	474.88	634.26	485.42	194.02	92.93	102.55	193.1	133.78	63.31	79.08	51.4	442.59	185.07	155.09	367.69	269.39	218.89	57.85	222.27	28.92	111.71	97.35	34.9	46.67
augustus_masked-19-processed-gene-5.45-mRNA-1	Phatr3_J48882	304769	48882	grey	DaUP		0.646002	0.694024	0	signal peptide		Lhcf15; protein fucoxanthin chlorophyll a/c protein			PF00504	Chlorophyll A-B binding protein				hypothetical protein	hypothetical protein (48882)		39.99	85.11	103.3	113.28	134.7	43.68	72.32	33.76	38.39	159.71	232	94.75	334.18	118.28	24.71	73.57	46.92	107.57	62.28	26.99	41.97	25.99	45.14	211.59	212.91	101.45	210.95
augustus_masked-17-processed-gene-2.104-mRNA-1	Phatr3_J48293	300548	48293	grey		LiUP	1.1064	1.09637	0	mitochondrion		hypothetical protein								hypothetical protein	hypothetical protein (48293)		343.51	506.71	608.3	285.05	293.67	380.28	176.2	200.57	266.74	335.55	255.4	235.77	266.21	304.81	394.99	259.66	474.75	288.36	242.77	421.38	204.53	309.37	221.54	364.59	309.9	198.92	263.54
augustus_masked-21-processed-gene-1.56-mRNA-1	Phatr3_J30139	305102	30139	greenyellow	LoFe-UP		1.45591	1.13476	0	other localisation	GTPase activity||GTP binding||intracellular||nucleus||cytoplasm||small GTPase mediated signal transduction	Sec4; hypothetical protein; K07901 Ras-related protein Rab-8A	Ras-related protein Rab-8A	Pancreatic secretion	PF00009||PF00025||PF00071||PF04670||PF08477	Elongation factor Tu GTP binding domain||ADP-ribosylation factor family||Ras family||Gtr1/RagA G protein conserved region||Miro-like protein	KOG0078	CELLULAR PROCESSES AND SIGNALING	Signal transduction mechanisms	GTP-binding protein SEC4, small G protein superfamily, and related Ras family GTP-binding proteins	GTP-binding protein SEC4, small G protein superfamily, and related Ras family GTP-binding proteins (30139)	small GTP-binding protein domain||_GAP_	443.42	534.69	316.74	483.68	320.87	317.84	1002.58	487.71	653.77	820.54	631.87	399.17	864.1	523.67	278.06	389.13	150	486	322.8	314.4	763.09	530.36	486.34	641.63	591.6	437.45	643.8
augustus_masked-14-processed-gene-3.16-mRNA-1	Phatr3_J47612	300408	47612	NULL	DaUP		0.861071	0.676472	1	signal peptide		hypothetical protein			PF13449	Esterase-like activity of phytase				hypothetical protein	hypothetical protein (47612)		6.87	3.5	5.88	15.29	12	9.51	3.94	9.92	8.61	6.44	16.12	19.26	10.9	4.73	4.98	3.06	18.19	14.26	17.77	6.79	6.54	10.31	52.13	4.83	5.52	19.94	14.67
augustus_masked-28-processed-gene-2.96-mRNA-1	Phatr3_J50259	303229	50259	darkgrey	HiFe-UP		0.705384	1.43109	0	other localisation	structural constituent of ribosome||ribosome||translation	rpl14; hypothetical protein; K02894 large subunit ribosomal protein L23e	large subunit ribosomal protein L23e	Ribosome	PF00238	Ribosomal protein L14p/L23e	KOG0901	INFORMATION STORAGE AND PROCESSING	Translation, ribosomal structure and biogenesis	60S ribosomal protein L14/L17/L23	60S ribosomal protein L14/L17/L23 (50259)		1180.78	1090.73	1893.57	409.52	476.18	942.59	1916.73	1302.69	1681.33	1208.89	954.73	398.53	406.68	1739.91	3504.54	751.24	1602.89	876.57	482.04	1392.06	2537.1	96.72	2167.14	2190.11	913.35	543.16	948.08
augustus_masked-3-processed-gene-13.91-mRNA-1	Phatr3_EG02399	305584	25956	turquoise	LiUP	LiUP	0.751747	1.55498	0	chloroplast	catalytic activity||metabolic process||cell redox homeostasis	phosphoadenosine-phosphosulphate reductase			PF00085||PF01507	Thioredoxin||Phosphoadenosine phosphosulfate reductase family	KOG0189	METABOLISM	Amino acid transport and metabolism	Phosphoadenosine phosphosulfate reductase	Phosphoadenosine phosphosulfate reductase (25956)		226.02	150.89	146.23	251.55	229.85	366.44	441.6	513.31	468.4	275.62	164.91	176.41	224.26	426.32	309.25	124.17	188.71	197.15	305.97	625.2	506.46	456.52	526.74	373.15	138.36	264.36	301.97
maker-24-snap-gene-4.301-mRNA-1	Phatr3_J23497	303112	23497	green	LoFe-UP	LoFe-UP	2.6459	0.654723	13	signal anchor	ATP binding||ATPase activity	hypothetical protein			PF00005||PF12698||PF13304	ABC transporter||ABC-2 family transporter protein||AAA domain	KOG0059	METABOLISM	Lipid transport and metabolism	Lipid exporter ABCA1 and related proteins, ABC superfamily	Lipid exporter ABCA1 and related proteins, ABC superfamily (23497)		87.87	63.52	133.5	91.72	67.33	48.1	41.63	37.83	59.11	150.13	247.16	94.06	28.84	35.8	54.01	48.15	48.98	45.22	68.77	27.03	26.4	27.4	38.16	55.75	71.4	53.82	16.99
augustus_masked-1-processed-gene-15.42-mRNA-1	Phatr3_J42911	311003	42911	grey60			1.21864	0.83711	0	other localisation		hypothetical protein								hypothetical protein	hypothetical protein (42911)		116.16	121.2	92.85	193.68	87.87	76.92	178.86	100.84	212.79	301.76	474.18	185.82	219.48	77.19	103.53	143.93	36.68	95.55	132.27	57.05	282.5	143.17	93.31	306.42	406.33	219.35	92.71
maker-1-snap-gene-10.487-mRNA-1	Phatr3_J42574	304857	42574	grey60			1.00006	0.730954	0	signal peptide		hypothetical protein			PF00194	Eukaryotic-type carbonic anhydrase				hypothetical protein	hypothetical protein (42574)		98.03	174.51	137.97	142.95	114.21	39.15	58.24	36.66	53.07	121.98	209.76	146.72	88.97	40.02	148.72	344.8	67.07	59.98	136.23	86.27	100.64	92.28	19.13	71.48	226.01	145.83	78.25
maker-2-augustus-gene-6.230-mRNA-1	Phatr3_J4936	309536	4936	brown	LoFe-UP+DaUP		3.37491	0.441536	0	signal peptide	proteolysis||cysteine-type peptidase activity	hypothetical protein; K08568 cathepsin X [EC:3.4.18.1]	cathepsin X [EC:3.4.18.1]	Lysosome	PF00112	Papain family cysteine protease	KOG1543	CELLULAR PROCESSES AND SIGNALING	Posttranslational modification, protein turnover, chaperones	Cysteine proteinase Cathepsin L	Cysteine proteinase Cathepsin L (4936)		177.92	229.66	227.2	732.25	547.97	176.32	500.97	188.83	205.31	174.78	258.66	326.97	1135.19	142.32	74.74	197.64	113.68	538.53	436.77	97.96	143.17	877.33	66.17	81.68	185.22	355.52	1013.74
maker-3-snap-gene-13.305-mRNA-1	Phatr3_J10532	305508	10532	yellow			1.07593	0.885209	0	other localisation	Mo-molybdopterin cofactor biosynthetic process	hypothetical protein			PF01967	MoaC family	KOG2876	METABOLISM	Coenzyme transport and metabolism	Molybdenum cofactor biosynthesis pathway protein	Molybdenum cofactor biosynthesis pathway protein (10532)	molybdenum cofactor biosynthesis protein C	60.22	52.44	44.54	60.93	61.02	39.97	64.59	48.02	41.1	51.35	48.58	69.89	43.6	45.91	49.94	49.38	58.97	61.49	75.65	50.22	65.41	58.7	41.05	45.62	64.74	55.62	44.01
augustus_masked-28-processed-gene-2.101-mRNA-1	Phatr3_J41172	303248	41172	grey			1.22777	1.45673	0	signal peptide	calcium ion binding||endoplasmic reticulum||protein folding||unfolded protein binding	calreticulin; K08057 calreticulin	calreticulin	Protein processing in endoplasmic reticulum || Phagosome || Antigen processing and presentation || Chagas disease (American trypanosomiasis) || HTLV-I infection	PF00262	Calreticulin family	KOG0674	CELLULAR PROCESSES AND SIGNALING	Posttranslational modification, protein turnover, chaperones	Calreticulin	Calreticulin (41172)		538.71	968.18	1672.97	356.31	274.27	366.39	918.17	593.51	1789.05	3165.67	1583.7	297.17	272.96	899.25	896.49	995.81	1561.79	373.9	365.4	612.95	933.34	339.11	875.74	2868.86	1876.89	251.91	214.7
augustus_masked-8-processed-gene-3.66-mRNA-1	Phatr3_J45811	311955	45811	blue	LoFe-UP	LoFe-UP	2.35653	0.747839	0	other localisation		hypothetical protein			PF00650	CRAL/TRIO domain				hypothetical protein	hypothetical protein (45811)		325.53	301.38	230.71	511.75	472.2	163.85	393.42	238.99	338.29	341.73	307.97	336.91	364.21	203.37	245.58	252.93	107.15	365.43	512.33	233.7	320.97	232.12	197.29	195.91	201.15	351.27	363.22
augustus_masked-5-processed-gene-3.167-mRNA-1	Phatr3_J26387	309837	26387	darkturquoise	LiUP	LiUP	1.12615	1.28021	0	other localisation	intracellular protein transport||Ran GTPase binding	hypothetical protein			PF03810||PF08506	Importin-beta N-terminal domain||Cse1	KOG1991	CELLULAR PROCESSES AND SIGNALING	Nuclear structure	Nuclear transport receptor RANBP7/RANBP8 (importin beta superfamily)	Nuclear transport receptor RANBP7/RANBP8 (importin beta superfamily) (26387)		47.29	43.76	20.58	29.25	34.8	41.81	33.23	36.27	33.77	35.77	34.19	38.91	24.87	31.75	43.91	34.22	18.21	28.92	34.84	30.83	37.29	48.69	32.52	27.05	33.02	32.19	26.02
maker-16-snap-gene-1.174-mRNA-1	Phatr3_J5651	304592	5651	lightcyan			0.925976	0.885257	0	other localisation		14-3-3-like protein; K06630 tyrosine 3-monooxygenase/tryptophan 5-monooxygenase activation protein	14-3-3 protein epsilon	Cell cycle || Oocyte meiosis || PI3K-Akt signaling pathway || Hippo signaling pathway || Hippo signaling pathway - fly || Neurotrophin signaling pathway || Epstein-Barr virus infection || Viral carcinogenesis	PF00244	14-3-3 protein	KOG0841	CELLULAR PROCESSES AND SIGNALING	Posttranslational modification, protein turnover, chaperones	Multifunctional chaperone (14-3-3 family)	Multifunctional chaperone (14-3-3 family) (5651)		851.36	1161.78	1387.18	378.49	442.56	201.02	811.51	205.12	839.85	1022.12	994.04	493.41	509.22	246.11	896.42	948.46	1072.71	443.35	537.51	303.73	592.86	407.38	516.61	1265.21	1269.49	576.67	397.04
augustus_masked-1-processed-gene-12.16-mRNA-1	Phatr3_J9171	302906	9171	greenyellow	LoFe-UP		1.50909	0.84991	1	signal peptide	cell redox homeostasis	hypothetical protein			PF00085||PF13848	Thioredoxin||Thioredoxin-like domain	KOG4277	POORLY CHARACTERIZED	General function prediction only	Uncharacterized conserved protein, contains thioredoxin domain	Uncharacterized conserved protein, contains thioredoxin domain (9171)		95.87	88.84	71.53	88.76	50.18	24.13	112.85	66.03	82.25	120.75	145.13	80.5	116.37	62.83	66.17	67.46	46.13	56.2	63.31	27.65	78.39	104.26	62.73	88.66	109.13	77.71	91.45
augustus_masked-5-processed-gene-3.151-mRNA-1	Phatr3_J26382	303737	26382	grey			0.698404	1.12852	0	chloroplast	"catalytic activity||3-beta-hydroxy-delta5-steroid dehydrogenase activity||steroid biosynthetic process||oxidoreductase activity, acting on the CH-OH group of donors, NAD or NADP as acceptor||cellular metabolic process||coenzyme binding||oxidation-reduction process"	hypothetical protein			PF01073||PF01370||PF05368||PF13460	3-beta hydroxysteroid dehydrogenase/isomerase family||NAD dependent epimerase/dehydratase family||NmrA-like family||NADH(P)-binding	KOG1203	METABOLISM	Carbohydrate transport and metabolism	Predicted dehydrogenase	Predicted dehydrogenase (26382)		180.89	73.96	51.68	106.45	129.65	109.55	198.73	159.1	215.36	106.68	120.14	112.3	208.07	165.85	186.01	60.77	109.16	106.63	120.83	143.74	297.13	61.05	250.25	166.95	116.2	128.56	243.52
augustus_masked-1-processed-gene-24.89-mRNA-1	Phatr3_J43251	300739	43251	tan		LiUP	1.10898	1.48341	0	other localisation	GTPase activity||signal transducer activity||GTP binding||intracellular||nucleus||cytoplasm||G-protein coupled receptor signaling pathway||small GTPase mediated signal transduction||guanyl nucleotide binding||G-protein beta/gamma-subunit complex binding	"Arf1; hypothetical protein; K07977 Arf/Sar family, other"	"Arf/Sar family, other"		PF00025||PF00071||PF00503||PF04670||PF08477||PF09439	ADP-ribosylation factor family||Ras family||G-protein alpha subunit||Gtr1/RagA G protein conserved region||Miro-like protein||Signal recognition particle receptor beta subunit	KOG0070	CELLULAR PROCESSES AND SIGNALING	Intracellular trafficking, secretion, and vesicular transport	GTP-binding ADP-ribosylation factor Arf1	GTP-binding ADP-ribosylation factor Arf1 (43251)	small GTP-binding protein domain||_GAP_	4297.78	6098.84	3470.02	2523.74	2956.72	1315.77	5642.59	1889.72	2956.26	2703.64	2097.74	1683.14	2268.51	2547.21	5616.05	4861.25	2320.84	3288.46	2156.57	1727.63	3790.74	2335.43	1887.39	3662.7	2650.44	1760.82	1620.6
maker-10-augustus-gene-3.166-mRNA-1	Phatr3_J27923	306272	27923	blue	DaUP	DaUP	1.1543	0.640277	0	other localisation	"ATP binding||ATP hydrolysis coupled proton transport||proton transport||hydrolase activity, acting on acid anhydrides, catalyzing transmembrane movement of substances||proton-transporting two-sector ATPase complex, catalytic domain||ATP metabolic process"	hypothetical protein; K02145 V-type H+-transporting ATPase subunit A [EC:3.6.3.14]	V-type H+-transporting ATPase subunit A [EC:3.6.3.14]	Oxidative phosphorylation || Phagosome || Synaptic vesicle cycle || Collecting duct acid secretion || Vibrio cholerae infection || Epithelial cell signaling in Helicobacter pylori infection || Rheumatoid arthritis	PF00006||PF00306||PF02874	ATP synthase alpha/beta family, nucleotide-binding domain||ATP synthase alpha/beta chain, C terminal domain||ATP synthase alpha/beta family, beta-barrel domain	KOG1352	METABOLISM	Energy production and conversion	Vacuolar H+-ATPase V1 sector, subunit A	Vacuolar H+-ATPase V1 sector, subunit A (27923)	"V-type ATPase, A subunit"	93.58	168.6	112.74	155.95	132.31	50.09	126.3	91.3	85.29	115.08	190.73	176.31	194.98	114.2	115.24	242.1	100.19	115.42	123.28	46.89	77.91	218.88	79.68	81.26	172.59	189.55	153.1
augustus_masked-26-processed-gene-3.80-mRNA-1	Phatr3_J50006	303173	50006	tan			1.03725	1.25615	1	signal anchor	response to metal ion||glutathione gamma-glutamylcysteinyltransferase activity||metal ion binding||phytochelatin biosynthetic process	hypothetical protein			PF05023	Phytochelatin synthase	KOG0632	METABOLISM	Inorganic ion transport and metabolism	Phytochelatin synthase	Phytochelatin synthase (50006)		33.83	50.37	16.41	27.07	17.67	13.48	23.96	16.04	23.85	26.42	25.77	19.73	14.94	18.64	28.96	49.21	8.33	25.3	14.98	11.7	22.94	43.02	11.7	31.06	44.1	19.95	11.97
RICE:10147933	Phatr3_J54465	301805	54465	brown	LoFe-UP		2.63763	0.532093	1	signal peptide		ISIP2A; iron starvation induced protein			PF07692	Low iron-inducible periplasmic protein				ISIP2A; iron starvation induced protein	ISIP2A; iron starvation induced protein (54465)		7322.03	5910.23	9660.52	31414.2	22910.7	7901.01	10339	8269.68	8013.74	5205.98	5429.31	7949.43	15541.6	9069.44	6558.95	8602.54	13293	32272.5	10529.3	8028.93	7850.21	8183.66	11543.6	7461.71	5631.69	12443.7	20005.8
[truncated: 58 more columns]
